# Supplementary material for: Enteric Protozoan Parasitosis and Associated Factors among Patients with and without Diabetes Mellitus in a Teaching Hospital in Ghana
Source: Hindawi journal article supplement (doi:10.1155/2023/5569262), 2023-12-09
Supplement: f1 [file 5569262.f1.zip]

## QUESTIONNAIRE

### Enteric protozoan parasitosis and associated factors among patients with and without diabetes mellitus in a Teaching Hospital in Ghana

#### Demographic Characteristics

1. Identify Number.....
2. Nationality.....
3. Place of Residence.....
4. Age .....
5. Gender:[ ☐ ] Male [ ☐ ] Female
6. Educational background:
  - a) Formal education [ ☐ ] Primary [ ☐ ] Vocational [ ☐ ] Secondary [ ☐ ] University and
  - b) Non-formal education [ ☐ ]
7. Occupation.....
8. Contact / Address (*optional*).....
9. How many years since you were diagnosed with type 2 diabetes?
  - a) Less than a year [ ☐ ] b) 1-2years [ ☐ ] c) 2-5years [ ☐ ] d) more than five years [ ☐ ]
10. Do you have any knowledge of deworming?  
Yes ( ☐ ) No ( ☐ )
11. Have you been dewormed for the past three months?  
Yes ( ☐ ) No ( ☐ )
12. Are you on any immunosuppressive drug?  
Yes ( ☐ ) No ( ☐ )
13. Do you have any medical condition aside from diabetes?  
Yes ( ☐ ) No ( ☐ )  
If yes state.....
