# Supplementary material for: Enteric Protozoan Parasitosis and Associated Factors among Patients with and without Diabetes Mellitus in a Teaching Hospital in Ghana
Source: Int J Microbiol. 2023 Dec 9;2023:5569262. doi: 10.1155/2023/5569262 (PMC10725318; doi:10.1155/2023/5569262)
Supplement: Supplementary Materials — S1: informed consent form; S2: questionnaire for the interview. [file 5569262.f1.zip]

Archive with 2 entries (2 files):
- S1 - Informed consent form.pdf
- S2 - Questionnaire.pdf
